# Supplementary material for: Reproducibility of Bioelectrical Impedance Analysis in Pregnancy and the Association of Body Composition with the Risk of Gestational Diabetes: A Substudy of MUMS Cohort
Source: PubMed Central journal article supplement (PMC7528004; doi:10.1155/2020/3128767), 2020-09-22

Supplementary Figure 1:

### Study Participant Flowchart

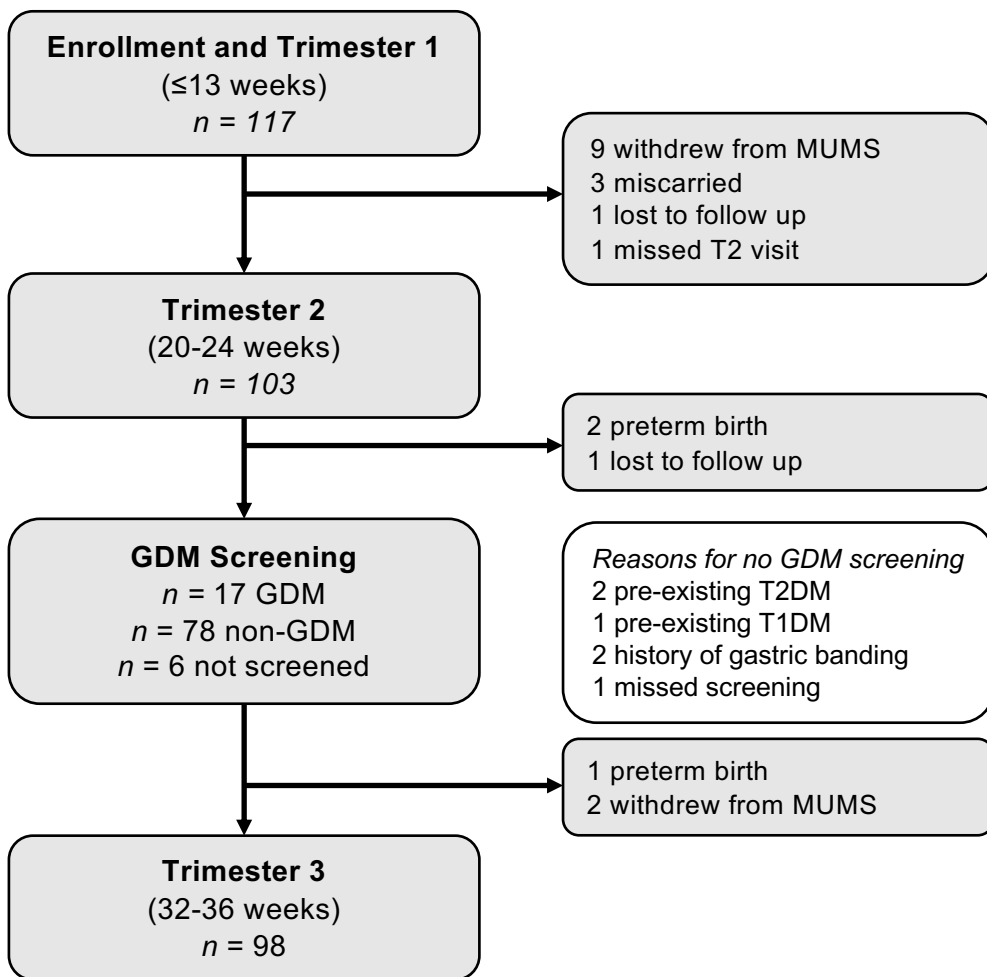

Supplement: 3128767.f1.pdf [file 3128767.f1.pdf]
